# Supplementary material for: Diversity and molecular epidemiology of Ostreid herpesvirus 1 in farmed Crassostrea gigas in Australia: Geographic clusters and implications for “microvariants” in global mortality events
Source: PubMed Central journal article supplement — Virus Res. 2022 Nov 2;323:198994. doi: 10.1016/j.virusres.2022.198994 (PMC10194400; doi:10.1016/j.virusres.2022.198994), 2022-11-02
Supplement: mmc1.pdf [file mmc1.pdf]

| Isolate ID | References | Region | River | Site           | Date collected | Summer season | Species | Pooling      | Age     | Size mm  | Mortality               | Viral load | Region 1 | Region 2 | Region 3 | Region 4 | Region 5 | Region 6 | Variant | Protein |
|------------|------------|--------|-------|----------------|----------------|---------------|---------|--------------|---------|----------|-------------------------|------------|----------|----------|----------|----------|----------|----------|---------|---------|
| 1          | 2, 3, 9    | NSW    | GR    | Site A         | 24-Nov-11      | 2011-2012     | C gigas | Pool of 5    | 5.5 mth | 28       | 96%                     | 3.22E+06   | G7       | NA       | NA       | G11      | NA       | G37      | NA      | NA      |
| 2          | 2, 3, 9    | NSW    | GR    | Site A         | 24-Nov-11      | 2011-2012     | C gigas | Pool of 5    | 5.5 mth | 28       | 96%                     | 3.07E+06   | G7       | NA       | G10      | G11      | NA       | G37      | NA      | NA      |
| 3          | 2, 3, 9    | NSW    | GR    | Site A         | 24-Nov-11      | 2011-2012     | C gigas | Pool of 5    | 5.5 mth | 28       | 96%                     | 4.34E+06   | G7       | NA       | G10      | G11      | NA       | G37      | NA      | NA      |
| 4          | 2, 3, 9    | NSW    | GR    | Site A         | 24-Nov-11      | 2011-2012     | C gigas | Pool of 5    | 5.5 mth | 28       | 96%                     | 1.71E+06   | G7       | G9       | G10      | G11      | NA       | G37      | V8      | ADH     |
| 5          | 2, 3, 9    | NSW    | GR    | Site A         | 24-Nov-11      | 2011-2012     | C gigas | Pool of 5    | 5.5 mth | 28       | 96%                     | 3.99E+06   | G7       | NA       | G10      | G11      | NA       | G37      | NA      | NA      |
| 6          | 2, 3, 9    | NSW    | GR    | Site B         | 10-Feb-12      | 2011-2012     | C gigas | Pool of 5    | 5.5 mth | 28       | 93%                     | 1.10E+05   | G7       | NA       | G10      | G20      | NA       | G37      | NA      | NA      |
| 7          | 2, 3, 9    | NSW    | GR    | Site B         | 10-Feb-12      | 2011-2012     | C gigas | Pool of 5    | 5.5 mth | 28       | 93%                     | 1.00E+05   | G7       | NA       | G10      | G20      | NA       | G37      | NA      | NA      |
| 8          | 2, 3, 9    | NSW    | GR    | Site B         | 10-Feb-12      | 2011-2012     | C gigas | Pool of 5    | 5.5 mth | 28       | 93%                     | 7.77E+04   | G7       | NA       | G10      | G20      | NA       | G37      | NA      | NA      |
| 9          | 2, 3, 9    | NSW    | GR    | Site B         | 10-Feb-12      | 2011-2012     | C gigas | Pool of 5    | 5.5 mth | 28       | 93%                     | 2.18E+05   | G7       | G9       | G10      | G20      | NA       | G37      | V3      | ADH     |
| 10         | 2, 3, 9    | NSW    | GR    | Site C         | 16-Nov-11      | 2011-2012     | C gigas | Pool of 5    | 5.5 mth | 28       | 46%                     | 2.32E+05   | G4       | NA       | G10      | G12      | NA       | G37      | NA      | NA      |
| 11         | 2, 3, 9    | NSW    | GR    | Site C         | 16-Nov-11      | 2011-2012     | C gigas | Pool of 5    | 5.5 mth | 28       | 46%                     | 2.15E+05   | G4       | NA       | G10      | G12      | NA       | G37      | NA      | NA      |
| 12         | 2, 3, 9    | NSW    | GR    | Site C         | 16-Nov-11      | 2011-2012     | C gigas | Pool of 5    | 5.5 mth | 28       | 46%                     | 2.85E+05   | NA       | NA       | NA       | G12      | NA       | G37      | NA      | NA      |
| 13         | 2, 3, 9    | NSW    | GR    | Site C         | 16-Nov-11      | 2011-2012     | C gigas | Pool of 5    | 5.5 mth | 28       | 46%                     | 1.70E+05   | G4       | G9       | G10      | G12      | NA       | G37      | V9      | ADH     |
| 14         | 2, 3, 9    | NSW    | GR    | Site C         | 16-Nov-11      | 2011-2012     | C gigas | Pool of 5    | 5.5 mth | 28       | 46%                     | 4.69E+05   | G4       | G9       | G10      | G12      | NA       | G37      | V9      | ADH     |
| 15         | 2, 3, 9    | NSW    | GR    | Site C         | 16-Nov-11      | 2011-2012     | C gigas | Pool of 5    | 5.5 mth | 28       | 99%                     | 5.42E+05   | G4       | NA       | G10      | G18      | NA       | NA       | NA      | NA      |
| 16         | 2, 3, 9    | NSW    | GR    | Site C         | 16-Nov-11      | 2011-2012     | C gigas | Pool of 5    | 5.5 mth | 28       | 99%                     | 4.72E+05   | G4       | NA       | G10      | G18      | NA       | G35      | NA      | NA      |
| 18         | 9          | NSW    | GR    | Site A         | 07-Nov-12      | 2012-2013     | C gigas | Individual   | 9.5 mth | 50       |                         | 6.89E+04   | NA       | G9       | G10      | NA       | NA       | NA       | NA      | NA      |
| 19         | 9          | NSW    | GR    | Site A         | 07-Nov-12      | 2012-2013     | C gigas | Individual   | 9.5 mth | 50       | Dead-group mortality 5% | 6.89E+04   | G7       | G9       | G10      | G21      | G34      | G37      | V4      | ADH     |
| 20         | 9          | NSW    | GR    | Site A         | 07-Nov-12      | 2012-2013     | C gigas | Individual   | 9.5 mth | 50       | Dead-group mortality 5% | 6.89E+04   | NA       | G9       | G10      | NA       | NA       | NA       | NA      | NA      |
| 22         | 9          | NSW    | GR    | Site A         | 07-Nov-12      | 2012-2013     | C gigas | Individual   | 9.5 mth | 50       | Dead-group mortality 5% | 6.89E+04   | G7       | G9       | G10      | G21      | NA       | G37      | NA      | NA      |
| 23         | 2, 3, 9    | NSW    | GR    | Site C         | 16-Nov-11      | 2011-2012     | C gigas | Pool of 5    | 5.5 mth | 28       | 99%                     | 2.97E+05   | NA       | NA       | G10      | NA       | NA       | G37      | NA      | NA      |
| 24         | 2, 3, 9    | NSW    | GR    | Site C         | 16-Nov-11      | 2011-2012     | C gigas | Pool of 5    | 5.5 mth | 28       | 99%                     | 1.51E+05   | G4       | NA       | G10      | G19      | NA       | G37      | NA      | NA      |
| 25         | 2, 3, 9    | NSW    | GR    | Site C         | 16-Nov-11      | 2011-2012     | C gigas | Pool of 5    | 5.5 mth | 28       | 99%                     | 2.03E+05   | G4       | NA       | NA       | G18      | NA       | G37      | NA      | NA      |
| 26         | 9          | NSW    | GR    | Site B         | 28-Nov-12      | 2012-2013     | C gigas | Pool of 5    | 9.5 mth | 50       | 27%                     | 6.14E+05   | G7       | G9       | G10      | G29      | NA       | G37      | V5      | ADH     |
| 27         | 9          | NSW    | GR    | Site C         | 13-Nov-12      | 2012-2013     | C gigas | Pool of 5    | 9.5 mth | 50       | 4%                      | 9.32E+03   | NA       | G9       | G10      | G21      | NA       | G37      | NA      | NA      |
| 28         | 9          | NSW    | GR    | Site A         | 11-Apr-13      | 2012-2013     | C gigas | Pool of 5    | 9.5 mth | 50       | 43%                     | 7.62E+03   | G7       | NA       | G10      | NA       | NA       | G37      | NA      | NA      |
| 29         | 9          | NSW    | GR    | Site B         | 15-Mar-13      | 2012-2013     | C gigas | Pool of 5    | 9.5 mth | 50       | 11%                     | 3.79E+04   | G2       | NA       | G10      | NA       | NA       | NA       | NA      | NA      |
| 30         | 9          | NSW    | GR    | Site C         | 15-Mar-13      | 2012-2013     | C gigas | Pool of 5    | 9.5 mth | 50       | 60%                     | 3.18E+04   | G2       | G9       | G10      | G22      | NA       | NA       | NA      | NA      |
| 31         | 1          | NSW    | HWY   | Mullet Creek   | 21-Jan-13      | 2012-2013     | C gigas | Pool of 5    | Spat    | 10-20 mm | 50%                     | 6.88E+05   | G7       | G8       | G10      | G11      | G31      | G36      | V1      | ACH     |
| 32         | 1          | NSW    | HWY   | Mullet Creek   | 21-Jan-13      | 2012-2013     | C gigas | Pool of 5    | Spat    | 10-20 mm | 50%                     | 1.12E+06   | G7       | G8       | G10      | G11      | G31      | G36      | V1      | ACH     |
| 33         | 1          | NSW    | HWY   | Mullet Creek   | 21-Jan-13      | 2012-2013     | C gigas | Pool of 5    | Spat    | 10-20 mm | 50%                     | 3.34E+05   | G7       | G8       | G10      | G11      | G31      | G36      | V1      | ACH     |
| 34         | 1          | NSW    | HWY   | Mullet Creek   | 21-Jan-13      | 2012-2013     | C gigas | Pool of 5    | Spat    | 10-20 mm | 50%                     | 3.34E+05   | G7       | G8       | G10      | G11      | NA       | G36      | V1      | ACH     |
| 35         | 1          | NSW    | HWY   | Mullet Creek   | 21-Jan-13      | 2012-2013     | C gigas | Pool of 5    | Spat    | 10-20 mm | 50%                     | 4.45E+05   | NA       | G8       | G10      | G11      | G31      | G36      | NA      | NA      |
| 36         | 1          | NSW    | HWY   | Mullet Creek   | 21-Jan-13      | 2012-2013     | C gigas | Pool of 5    | Spat    | 10-20 mm | 50%                     | 4.45E+05   | G7       | G8       | G10      | G11      | NA       | G36      | V1      | ACH     |
| 37         | 1          | NSW    | HWY   | Mullet Creek   | 21-Jan-13      | 2012-2013     | C gigas | Pool of 5    | Spat    | 10-20 mm | 50%                     | 2.11E+05   | G7       | G8       | G10      | G11      | G31      | G36      | V1      | ACH     |
| 38         | 1          | NSW    | HWY   | Mullet Creek   | 21-Jan-13      | 2012-2013     | C gigas | Pool of 5    | Spat    | 10-20 mm | 50%                     | 2.11E+05   | G7       | G8       | G10      | G11      | G31      | G36      | V1      | ACH     |
| 39         | 1          | NSW    | HWY   | Porto Bay      | 15-Feb-13      | 2012-2013     | C gigas | Pool of 5    | Spat    | 30-90 mm | 60-90%                  | 4.19E+04   | G7       | G8       | G10      | G11      | G31      | G36      | V1      | ACH     |
| 40         | 1          | NSW    | HWY   | Porto Bay      | 15-Feb-13      | 2012-2013     | C gigas | Pool of 5    | Spat    | 30-90 mm | 60-90%                  | 4.35E+04   | G7       | G8       | G10      | G11      | G31      | G36      | V1      | ACH     |
| 41         | 1          | NSW    | HWY   | Coba Bay       | 29-Jan-13      | 2012-2013     | C gigas | Pool of 3    | NA      | 50-70mm  | Yes                     | 3.39E+05   | G7       | G8       | G10      | G11      | G31      | G36      | V1      | ACH     |
| 42         | 7          | NSW    | HWY   | Kimmerkong Bay | 31-Dec-13      | 2013-2014     | C gigas | Pool of 7-11 | Spat    | 6.8      | 80%                     | 1.42E+04   | G7       | G8       | G10      | G11      | G31      | G36      | V1      | ACH     |
| 43         | 7          | NSW    | HWY   | Kimmerkong Bay | 31-Dec-13      | 2013-2014     | C gigas | Pool of 7-11 | Spat    | 6.8      | 80%                     | 1.65E+04   | G7       | G8       | G10      | G11      | G31      | G36      | V1      | ACH     |
| 44         | 7          | NSW    | HWY   | Kimmerkong Bay | 31-Dec-13      | 2013-2014     | C gigas | Pool of 7-11 | Spat    | 6.8      | 80%                     | 7.95E+04   | G7       | G8       | G10      | G11      | G31      | G36      | V1      | ACH     |
| 45         | 7          | NSW    | HWY   | Kimmerkong Bay | 31-Dec-13      | 2013-2014     | C gigas | Pool of 7-11 | Spat    | 6.8      | 80%                     | 2.02E+04   | G7       | NA       | G10      | G11      | NA       | G36      | NA      | NA      |
| 46         | 7          | NSW    | HWY   | Kimmerkong Bay | 31-Dec-13      | 2013-2014     | C gigas | Pool of 7-11 | Spat    | 6.8      | 80%                     | 3.68E+03   | G7       | G8       | G10      | G11      | G31      | G37      | V6      | ACH     |
| 47         | 7          | NSW    | GR    | Site A         | 14-Jan-14      | 2013-2014     | C gigas | Pool of 5    | Spat    | 12.2     | 85%                     | 1.74E+04   | G7       | G9       | NA       | G11      | G32      | G36      | NA      | NA      |
| 48         | 8          | NSW    | HWY   | Mooney Mooney  | 25-Jan-14      | 2013-2014     | C gigas | Pool of 5-6  | Spat    | 12       | 100%                    | 4.00E+05   | G7       | G8       | G10      | G11      | G31      | G36      | V1      | ACH     |
| 49         | 8          | NSW    | HWY   | Mooney Mooney  | 25-Jan-14      | 2013-2014     | C gigas | Pool of 5-6  | Spat    | 12       | 100%                    | 5.87E+05   | G7       | G8       | G10      | G11      | G31      | G36      | V1      | ACH     |
| 50         | 8          | NSW    | HWY   | Mooney Mooney  | 25-Jan-14      | 2013-2014     | C gigas | Pool of 5-6  | Spat    | 12       | 100%                    | 5.58E+05   | G7       | G8       | G10      | G11      | G31      | G36      | V1      | ACH     |
| 51         | 8          | NSW    | HWY   | Mooney Mooney  | 25-Jan-14      | 2013-2014     | C gigas | Pool of 5-6  | Spat    | 12       | 100%                    | 9.75E+05   | G7       | G8       | G10      | G11      | G31      | G36      | V1      | ACH     |
| 52         | 8          | NSW    | HWY   | Mooney Mooney  | 25-Jan-14      | 2013-2014     | C gigas | Pool of 5-6  | Spat    | 12       | 100%                    | 1.30E+06   | G7       | G8       | G10      | G11      | G31      | G36      | V1      | ACH     |
| 53         | 8          | NSW    | HWY   | Mooney Mooney  | 25-Jan-14      | 2013-2014     | C gigas | Pool of 5-6  | Spat    | 13       | 100%                    | 4.59E+05   | G7       | G8       | G10      | G11      | G31      | G36      | V1      | ACH     |
| 54         | 8          | NSW    | HWY   | Mooney Mooney  | 25-Jan-14      | 2013-2014     | C gigas | Pool of 5-6  | Spat    | 13       | 100%                    | 2.52E+05   | G7       | G8       | G10      | G11      | G31      | G36      | V1      | ACH     |
| 55         | 8          | NSW    | HWY   | Mooney Mooney  | 25-Jan-14      | 2013-2014     | C gigas | Pool of 5-6  | Spat    | 13       | 100%                    | 1.87E+05   | G7       | G8       | G10      | G11      | G31      | G36      | V1      | ACH     |
| 56         | 8          | NSW    | HWY   | Mooney Mooney  | 25-Jan-14      | 2013-2014     | C gigas | Pool of 5-6  | Spat    | 13       | 100%                    | 2.18E+05   | G7       | G8       | G10      | G11      | G31      | G36      | V1      | ACH     |
| 57         | 8          | NSW    | HWY   | Mooney Mooney  | 25-Jan-14      | 2013-2014     | C gigas | Pool of 5-6  | Spat    | 13       | 100%                    | 4.83E+05   | G7       | G8       | G10      | G11      | G31      | G37      | V6      | ACH     |
| 65         | 7          | NSW    | GR    | The Shed       | 28-Jan-14      | 2013-2014     | C gigas | Pool of 5-6  | Spat    | 12       | 95%                     | 1.47E+04   | G7       | G9       | G10      | G13      | NA       | G37      | V7      | ADH     |
| 66         | 7          | NSW    | GR    | The Shed       | 28-Jan-14      | 2013-2014     | C gigas | Pool of 5-6  | Spat    | 12       | 95%                     | 6.93E+03   | G7       | G9       | G10      | G13      | NA       | G37      | V7      | ADH     |
| 67         | 7          | NSW    | GR    | The Shed       | 28-Jan-14      | 2013-2014     | C gigas | Pool of 5-6  | Spat    | 12       | 95%                     | 2.44E+04   | G7       | G9       | G10      | G13      | NA       | G37      | V7      | ADH     |
| 68         | 7          | NSW    | GR    | The Shed       | 28-Jan-14      | 2013-2014     | C gigas | Pool of 5-6  | Spat    | 12       | 95%                     | 1.22E+04   | G7       | G9       | G10      | G13      | NA       | G37      | V7      | ADH     |
| 69         | 7          | NSW    | GR    | The Shed       | 28-Jan-14      | 2013-2014     | C gigas | Pool of 5-6  | Spat    | 12       | 95%                     | 5.62E+04   | G7       | G9       | G10      | G13      | NA       | G37      | V7      | ADH     |
| 70         | 10         | NSW    | GR    | Site C         | 25-Feb-14      | 2013-2014     | C gigas | Individual   | 14 mth  | 49       |                         | 4.08E+05   | G1       | G9       | G10      | G11      | NA       | G37      | V2      | ADH     |
| 71         | 10         | NSW    | GR    | Site C         | 25-Feb-14      | 2013-2014     | C gigas | Pool of 3    | 8 mth   | 37       |                         | 1.49E+05   | G1       | G9       | G10      | G11      | NA       | G37      | V2      | ADH     |
| 72         | 10         | NSW    | GR    | Site C         | 25-Feb-14      | 2013-2014     | C gigas | Pool of 3    | 8 mth   | 37       |                         | 3.80E+05   | G1       | G9       | G10      | NA       | NA       | G37      | NA      | NA      |
| 73         | 10         | NSW    | GR    | Site C         | 25-Feb-14      | 2013-2014     | C gigas | Pool of 3    | 14 mth  | 49       |                         | 2.85E+05   | G1       | G9       | G10      | G11      | NA       | G37      | V2      | ADH     |
| 74         | 7,8        | NSW    | HWY   | Mooney Mooney  | 18-Nov-14      | 2014-2015     | C gigas | Pool of 5    | Spat    | 5        | 100%                    | 1.24E+05   | G7       | G8       | G10      | G11      | NA       | G36      | V1      | ACH     |
| 75         | 7,8        | NSW    | HWY   | Mooney Mooney  | 18-Nov-14      | 2014-2015     | C gigas | Pool of 5    | Spat    | 5        | 100%                    | 8.13E+05   | G7       | G8       | G10      | G11      | NA       | G36      | V1      | ACH     |
| 76         | 7,8        | NSW    | HWY   | Mooney Mooney  | 18-Nov-14      | 2014-2015     | C gigas | Pool of 5    | Spat    | 5        | 100%                    | 2.20E+05   | G7       | G8       | G10      | G11      | NA       | G36      | V1      | ACH     |
| 77         | 7,8        | NSW    | HWY   | Mooney Mooney  | 18-Nov-14      | 2014-2015     | C gigas | Pool of 5    | Spat    | 5        | 100%                    | 4.89E+05   | G7       | G8       | G10      | G11      | NA       | G36      | V1      | ACH     |
| 78         | 7,8        | NSW    | HWY   | Mooney Mooney  | 18-Nov-14      | 2014-2015     | C gigas | Pool of 5    | Spat    | 5        | 100%                    | 5.01E+05   | G7       | G8       | G10      | G11      | NA       | G36      | V1      | ACH     |

| Isolate ID | References         | Region | River | Site            | Date collected | Summer season | Species | Pooling     | Age    | Size mm | Mortality                      | Viral load | Region 1 | Region 2 | Region 3 | Region 4 | Region 5 | Region 6 | Variant | Protein |
|------------|--------------------|--------|-------|-----------------|----------------|---------------|---------|-------------|--------|---------|--------------------------------|------------|----------|----------|----------|----------|----------|----------|---------|---------|
| 79         | 10                 | NSW    | GR    | Site C          | 27-Jan-15      | 2014-2015     | C gigas | Individual  | 17 mth | 64      | Dead-group mortality 21%       | 5.10E+05   | G7       | G9       | G10      | G11      | NA       | G37      | V8      | ADH     |
| 80         | 10                 | NSW    | GR    | Site C          | 27-Jan-15      | 2014-2015     | C gigas | Individual  | 17 mth | 64      | Dead-group mortality 21%       | 6.96E+05   | G7       | G9       | G10      | G11      | NA       | G37      | V8      | ADH     |
| 81         | 10                 | NSW    | GR    | Site C          | 27-Jan-15      | 2014-2015     | C gigas | Individual  | 17 mth | 64      | Dead-group mortality 21%       | 5.06E+05   | G7       | G9       | G10      | G11      | NA       | G37      | V8      | ADH     |
| 82         | 10                 | NSW    | GR    | Site C          | 27-Jan-15      | 2014-2015     | C gigas | Individual  | 17 mth | 64      | Dead-group mortality 21%       | 3.76E+05   | G7       | G9       | G10      | G11      | NA       | G37      | V8      | ADH     |
| 83         | 10                 | NSW    | GR    | Site C          | 27-Jan-15      | 2014-2015     | C gigas | Individual  | 8 mth  | 23      | Dead-group mortality 93%       | 2.32E+06   | G7       | NA       | G10      | G11      | NA       | G37      | NA      | NA      |
| 84         | 10                 | NSW    | GR    | Site C          | 27-Jan-15      | 2014-2015     | C gigas | Individual  | 8 mth  | 28      | Dead-group mortality 93%       | 4.29E+05   | G7       | G9       | G10      | G11      | NA       | G37      | V8      | ADH     |
| 85         | 10                 | NSW    | GR    | Site C          | 27-Jan-15      | 2014-2015     | C gigas | Individual  | 8 mth  | 27      | Dead-group mortality 93%       | 2.36E+05   | G7       | G9       | G10      | G11      | NA       | G37      | V8      | ADH     |
| 98         | 7                  | NSW    | GR    | The Shed        | 04-Nov-13      | 2013-2014     | C gigas | Pool of 5-8 | Spat   | 7       | 100%                           | 1.39E+05   | NA       | NA       | G10      | G23      | G34      | NA       | NA      | NA      |
| 99         | 7                  | NSW    | GR    | The Shed        | 11-Dec-13      | 2013-2014     | C gigas | Pool of 8   | Spat   | 7.5     | 50-95%                         | 2.45E+04   | NA       | NA       | G10      | G23      | G34      | NA       | NA      | NA      |
| 100        | 7                  | NSW    | GR    | The Shed        | 18-Dec-13      | 2013-2014     | C gigas | Pool of 8   | Spat   | 7.5     | 70-90%                         | 1.50E+05   | NA       | NA       | G10      | G24      | G33      | NA       | NA      | NA      |
| 101        | 7                  | NSW    | GR    | Limekiln Bar    | 28-Jan-14      | 2013-2014     | C gigas | Pool of 5-6 | Spat   | 14      | 100%                           | 2.25E+01   | NA       | NA       | G10      | NA       | NA       | NA       | NA      | NA      |
| 102        | 7                  | NSW    | GR    | Neverfail Bay   | 16-Dec-14      | 2014-2015     | C gigas | Individual  | Spat   | 40      | Dead-group mortality 50%       | 6.40E+06   | G7       | G9       | G10      | G14      | NA       | G37      | V10     | ADH     |
| 103        | 7                  | NSW    | GR    | Neverfail Bay   | 16-Dec-14      | 2014-2015     | C gigas | Individual  | Spat   | 40      | Dead-group mortality 5%        | 3.95E+06   | G7       | G9       | G10      | G14      | NA       | G37      | V10     | ADH     |
| 104        | 10                 | NSW    | GR    | Site B          | 27-Jan-15      | 2014-2015     | C gigas | Individual  | 8 mth  | 24      | Dead-group mortality 100%      | 1.03E+06   | G7       | G9       | G10      | G15      | NA       | G37      | V11     | ADH     |
| 105        | 10                 | NSW    | GR    | Site B          | 27-Jan-15      | 2014-2015     | C gigas | Individual  | 8 mth  | 24      | Dead-group mortality 100%      | 1.42E+06   | G7       | G9       | G10      | G17      | NA       | G37      | V12     | ADH     |
| 106        | 10                 | NSW    | GR    | Site B          | 24-Feb-15      | 2014-2015     | C gigas | Individual  | 17 mth | 73      | Dead-group mortality 48%       | 6.41E+03   | G7       | G9       | G10      | G11      | G34      | G37      | V8      | ADH     |
| 107        | 10                 | NSW    | GR    | Site B          | 24-Feb-15      | 2014-2015     | C gigas | Individual  | 17 mth | 56      | Dead-group mortality 48%       | 2.40E+05   | NA       | G9       | G10      | G15      | G34      | G37      | NA      | NA      |
| 108        | 7                  | NSW    | GR    | Site C          | 09-Nov-15      | 2015-2016     | C gigas | Pool of 7   | Spat   | 5.3     | 80%                            | 2.74E+04   | G7       | G9       | G10      | G11      | G34      | G37      | V8      | ADH     |
| 109        | 7                  | NSW    | GR    | Site C          | 09-Nov-15      | 2015-2016     | C gigas | Pool of 7   | Spat   | 5.4     | 30%                            | 9.70E+03   | G7       | G9       | G10      | G11      | G34      | G37      | V8      | ADH     |
| 110        | 7 ("other trials") | NSW    | HWY   | Porto Bay       | 28-Nov-14      | 2014-2015     | C gigas | Individual  | 1 yr   | 80-110  | Dead-group mortality up to 70% | 2.60E+05   | G7       | G8       | G10      | G11      | G31      | G36      | V1      | ACH     |
| 111        | 7 ("other trials") | NSW    | HWY   | Porto Bay       | 28-Nov-14      | 2014-2015     | C gigas | Individual  | 1 yr   | 80-110  | Dead-group mortality up to 70% | 2.62E+05   | G7       | G8       | G10      | G11      | G31      | G36      | V1      | ACH     |
| 112        | 7                  | NSW    | HWY   | Porto Bay       | 28-Nov-14      | 2014-2015     | C gigas | Pool of 3   | Spat   | 29      | 100%                           | 6.73E+05   | G7       | G8       | G10      | G11      | G31      | G36      | V1      | ACH     |
| 113        | 7                  | NSW    | HWY   | Porto Bay       | 28-Nov-14      | 2014-2015     | C gigas | Pool of 3   | Spat   | 17      | 100%                           | 8.12E+05   | G7       | G8       | G10      | G11      | G31      | G36      | V1      | ACH     |
| 114        | 7                  | NSW    | HWY   | Mullet Creek    | 26-Oct-15      | 2015-2016     | C gigas | Pool of 7   | Spat   | 10.3    | 100%                           | 2.96E+05   | G7       | G8       | G10      | G11      | G31      | G36      | V1      | ACH     |
| 115        | 7                  | NSW    | HWY   | Mullet Creek    | 26-Oct-15      | 2015-2016     | C gigas | Pool of 7   | Spat   | 9.9     | 100%                           | 1.71E+05   | NA       | G8       | G10      | G11      | G31      | G36      | NA      | NA      |
| 118        | 11                 | TAS    | TAS   | Pitt Water      | 02-Feb-16      | 2015-2016     | C gigas | Individual  | Spat   | 80      | Dead-mortality at Site 50%     | 1.83E+06   | G6       | G9       | G10      | NA       | NA       | G37      | NA      | NA      |
| 119        | 11                 | TAS    | TAS   | Pitt Water      | 02-Feb-16      | 2015-2016     | C gigas | Individual  | Spat   | 90      | Dead-mortality at Site 50%     | 1.39E+06   | NA       | G9       | G10      | NA       | G34      | G37      | NA      | NA      |
| 120        | 7                  | NSW    | HWY   | Coba Bay        | 08-Dec-15      | 2015-2016     | C gigas | Pool of 7   | Spat   | 6.5     | 20%                            | 8.74E+04   | G7       | G9       | G10      | NA       | NA       | G37      | NA      | NA      |
| 123        | 7                  | NSW    | GR    | Site A          | 01-Feb-16      | 2015-2016     | C gigas | Pool of 5   | Spat   | 18.5    | 50%                            | 6.26E+04   | G7       | G9       | G10      | NA       | G34      | G37      | NA      | NA      |
| 124        | 7                  | NSW    | GR    | Site A          | 01-Feb-16      | 2015-2016     | C gigas | Pool of 5   | Spat   | 14      | 50%                            | 2.40E+05   | G7       | G9       | G10      | NA       | G34      | G37      | NA      | NA      |
| 125        | 7                  | NSW    | GR    | Sylvania Waters | 09-Feb-16      | 2015-2016     | C gigas | Pool of 5   | Spat   | 9.5     | 50%                            | 5.82E+03   | G7       | G9       | G10      | NA       | G34      | G37      | NA      | NA      |
