# Supplementary material for: Diversity and molecular epidemiology of Ostreid herpesvirus 1 in farmed Crassostrea gigas in Australia: Geographic clusters and implications for “microvariants” in global mortality events
Source: PubMed Central journal article supplement — Virus Res. 2022 Nov 2;323:198994. doi: 10.1016/j.virusres.2022.198994 (PMC10194400; doi:10.1016/j.virusres.2022.198994), 2022-11-02
Supplement: mmc4.pdf [file mmc4.pdf]

Table 1: Isolates included in phylogenetic tree for concatenated sequences.

| <b>GenBank Number</b> | <b>Country of origin of virus</b> | <b>Year isolated</b> | <b>Host species</b>          |
|-----------------------|-----------------------------------|----------------------|------------------------------|
| MF509813.1            | China                             | 2001                 | <i>Azumapecten farreri</i>   |
| GQ153938.1            | China                             | 2007                 | <i>Chlamys farreri</i>       |
| KP412538.1            | China                             | 2012                 | <i>Scapharca broughtonii</i> |
| MW412420.1            | China                             | 2019                 | <i>Anadara broughtonii</i>   |
| NC 005881.2           | France                            | 1994                 | <i>Crassostrea gigas</i>     |
| KY242785.1            | France                            | 2010                 | <i>Crassostrea gigas</i>     |
| OM811587.1            | France                            | 2018                 | <i>Crassostrea gigas</i>     |
| OM811586.1            | France                            | 2018                 | <i>Crassostrea gigas</i>     |
| OM811585.1            | France                            | 2018                 | <i>Crassostrea gigas</i>     |
| OM811584.1            | France                            | 2018                 | <i>Crassostrea gigas</i>     |
| OM811583.1            | France                            | 2018                 | <i>Crassostrea gigas</i>     |
| OM811582.1            | France                            | 2018                 | <i>Crassostrea gigas</i>     |
| OM811580.1            | France                            | 2018                 | <i>Crassostrea gigas</i>     |
| OM811579.1            | France                            | 2018                 | <i>Crassostrea gigas</i>     |
| OM811578.1            | France                            | 2018                 | <i>Crassostrea gigas</i>     |
| OM811577.1            | France                            | 2018                 | <i>Crassostrea gigas</i>     |
| OM811596.1            | France                            | 2018                 | <i>Crassostrea gigas</i>     |
| OM811594.1            | France                            | 2018                 | <i>Crassostrea gigas</i>     |
| OM811593.1            | France                            | 2018                 | <i>Crassostrea gigas</i>     |
| OM811592.1            | France                            | 2018                 | <i>Crassostrea gigas</i>     |
| OM811591.1            | France                            | 2018                 | <i>Crassostrea gigas</i>     |
| OM811590.1            | France                            | 2018                 | <i>Crassostrea gigas</i>     |
| OM811589.1            | France                            | 2018                 | <i>Crassostrea gigas</i>     |
| OM811595.1            | France                            | 2018                 | <i>Crassostrea gigas</i>     |
| OM811588.1            | France                            | 2019                 | <i>Crassostrea gigas</i>     |
| OM811581.1            | France                            | 2019                 | <i>Crassostrea gigas</i>     |
| OM811597.1            | France                            | 2019                 | <i>Crassostrea gigas</i>     |
| KY271630.1            | Ireland                           | 2011                 | <i>Crassostrea gigas</i>     |
| MG561751.2            | Italy                             | 2016                 | <i>Crassostrea gigas</i>     |

Table 2: Isolates included in phylogenetic tree R1.

| <b>GenBank Number</b> | <b>Country of origin of virus</b> | <b>Year isolated</b> | <b>Host species</b>              |
|-----------------------|-----------------------------------|----------------------|----------------------------------|
| KC685525.1            | Australia                         | 2010                 | <i>Crassostrea gigas</i>         |
| MT157286.1            | Australia                         | 2010                 | <i>Crassostrea gigas</i>         |
| GQ153938.1            | China                             | 2007                 | <i>Chlamys farreri</i>           |
| KP412538.1            | China                             | 2012                 | <i>Scapharca broughtonii</i>     |
| MW412420.1            | China                             | 2019                 | <i>Anadara broughtonii</i>       |
| JN800132.1            | China                             | 2002                 | <i>Crassostrea gigas</i>         |
| KM886594.1            | China                             | 2013                 | <i>Crassostrea gigas</i>         |
| KM886595.1            | China                             | 2010                 | <i>Chlamys farreri</i>           |
| KM886593.1            | China                             | 2011                 | <i>Crassostrea hongkongensis</i> |
| KU518246.1            | China                             | 2015                 | <i>Patinopecten yessoensis</i>   |
| KM886592.1            | China                             | 2011                 | <i>Crassostrea hongkongensis</i> |
| KR075682.1            | China                             | 2012                 | <i>Scapharca broughtonii</i>     |
| KR075681.1            | China                             | 2013                 | <i>Scapharca broughtonii</i>     |
| KM886576.1            | China                             | 2013                 | <i>Meretrix meretrix</i>         |
| KR075680.1            | China                             | 2012                 | <i>Scapharca broughtonii</i>     |
| KM886579.1            | China                             | 2007                 | <i>Chlamys farreri</i>           |
| KR075683.1            | China                             | 2011                 | <i>Scapharca broughtonii</i>     |
| KM886575.1            | China                             | 2012                 | <i>Scapharca broughtonii</i>     |
| KM886589.1            | China                             | 2003                 | <i>Chlamys farreri</i>           |
| KM886582.1            | China                             | 2001                 | <i>Chlamys farreri</i>           |
| MF509813.1            | China                             | 2001                 | <i>Azumapecten farreri</i>       |
| NC 005881.2           | France                            | 1994                 | <i>Crassostrea gigas</i>         |
| KY242785.1            | France                            | 2010                 | <i>Crassostrea gigas</i>         |
| KM115665.1            | France                            | 2012                 | <i>Crassostrea gigas</i>         |
| KT429170.1            | France                            | 2011                 | <i>Crassostrea gigas</i>         |
| KF185070.1            | France                            | 2011                 | <i>Crassostrea gigas</i>         |
| JN800100.1            | France                            | 2008                 | <i>Crassostrea gigas</i>         |
| HQ842610.1            | France                            | 2009                 | <i>Crassostrea gigas</i>         |
| KT429176.1            | France                            | 2011                 | <i>Crassostrea gigas</i>         |
| KT429175.1            | France                            | 2009                 | <i>Crassostrea gigas</i>         |
| KT429174.1            | France                            | 2011                 | <i>Crassostrea gigas</i>         |
| KT429173.1            | France                            | 2012                 | <i>Crassostrea gigas</i>         |
| KT429171.1            | France                            | 2012                 | <i>Crassostrea gigas</i>         |
| KT429169.1            | France                            | 2012                 | <i>Crassostrea gigas</i>         |
| KT429168.1            | France                            | 2012                 | <i>Crassostrea gigas</i>         |
| KT429167.1            | France                            | 2012                 | <i>Crassostrea gigas</i>         |
| KT429166.1            | France                            | 2012                 | <i>Crassostrea gigas</i>         |

|            |             |               |                             |
|------------|-------------|---------------|-----------------------------|
| KT429164.1 | France      | 2012          | <i>Crassostrea gigas</i>    |
| KT429163.1 | France      | 2011          | <i>Crassostrea gigas</i>    |
| KT429162.1 | France      | 2012          | <i>Crassostrea gigas</i>    |
| JN800122.1 | France      | 2010          | <i>Crassostrea gigas</i>    |
| JN800120.1 | France      | 2010          | <i>Crassostrea gigas</i>    |
| KF185073.1 | France      | 2009          | <i>Crassostrea gigas</i>    |
| KF185075.1 | France      | 2010          | <i>Crassostrea gigas</i>    |
| JN800111.1 | France      | 2008          | <i>Crassostrea gigas</i>    |
| JN800067.1 | France      | 1993          | <i>Crassostrea gigas</i>    |
| JN800085.1 | France      | 2006          | <i>Crassostrea gigas</i>    |
| KT429165.1 | France      | 2012          | <i>Crassostrea gigas</i>    |
| KY271630.1 | Ireland     | 2011          | <i>Crassostrea gigas</i>    |
| JN800129.1 | Ireland     | 2009          | <i>Crassostrea gigas</i>    |
| MG561751.2 | Italy       | 2016          | <i>Crassostrea gigas</i>    |
| AB734065.1 | Japan       | 2011          | <i>Crassostrea gigas</i>    |
| AB734077.1 | Japan       | 2007          | <i>Crassostrea gigas</i>    |
| AB734071.1 | Japan       | 2011          | <i>Crassostrea gigas</i>    |
| AB734062.1 | Japan       | 2011          | <i>Crassostrea gigas</i>    |
| AB734057.1 | Japan       | 2007 and 2011 | <i>Crassostrea gigas</i>    |
| AB734079.1 | Japan       | 2007          | <i>Crassostrea gigas</i>    |
| AB734075.1 | Japan       | 2007          | <i>Crassostrea sikamea</i>  |
| AB734070.1 | Japan       | 2011          | <i>Crassostrea gigas</i>    |
| AB734067.1 | Japan       | 2011          | <i>Crassostrea gigas</i>    |
| AB734058.1 | Japan       | 2007 and 2011 | <i>Crassostrea gigas</i>    |
| JN800133.1 | Japan       | 2010          | <i>Crassostrea gigas</i>    |
| KT429178.1 | Japan       | 2012          | <i>Crassostrea gigas</i>    |
| AB734078.1 | Japan       | 2007          | <i>Crassostrea gigas</i>    |
| AB734072.1 | Japan       | 2011          | <i>Crassostrea gigas</i>    |
| AB734068.1 | Japan       | 2011          | <i>Crassostrea gigas</i>    |
| AB734060.1 | Japan       | 2011          | <i>Crassostrea gigas</i>    |
| AB734059.1 | Japan       | 2011          | <i>Crassostrea gigas</i>    |
| AB734069.1 | Japan       | 2011          | <i>Crassostrea gigas</i>    |
| AB734061.1 | Japan       | 2011          | <i>Crassostrea gigas</i>    |
| AB734064.1 | Japan       | 2011          | <i>Crassostrea gigas</i>    |
| AB734063.1 | Japan       | 2011          | <i>Crassostrea gigas</i>    |
| AB734073.1 | Japan       | 2007          | <i>Crassostrea gigas</i>    |
| AB734066.1 | Japan       | 2011          | <i>Crassostrea gigas</i>    |
| AB734076.1 | Japan       | 2007          | <i>Crassostrea gigas</i>    |
| KY921758.1 | Mexico      | 2013          | <i>Crassostrea gigas</i>    |
| JF894308.1 | Mexico      | 2011          | <i>Crassostrea gigas</i>    |
| JN639858.1 | New Zealand | 2010          | <i>Crassostrea gigas</i>    |
| JN800131.1 | New Zealand | 2010          | <i>Crassostrea gigas</i>    |
| JN800130.1 | New Zealand | 2011          | <i>Crassostrea gigas</i>    |
| KM593669.1 | Portugal    | 2011          | <i>Crassostrea angulata</i> |

|            |             |             |                          |
|------------|-------------|-------------|--------------------------|
| KT429177.1 | Portugal    | 2012        | <i>Crassostrea gigas</i> |
| JQ959598.1 | South Korea | 2011        | <i>Crassostrea gigas</i> |
| JQ959597.1 | South Korea | 2011        | <i>Crassostrea gigas</i> |
| KU861510.1 | Spain       | 2014        | <i>Ostrea edulis</i>     |
| MT702618.1 | Spain       | 2015        | <i>Octopus vulgaris</i>  |
| MT702617.1 | Spain       | 2016        | <i>Octopus vulgaris</i>  |
| KF185069.1 | unknown     | before 2008 | <i>Crassostrea gigas</i> |
| MW504462.1 | USA         | 2018        | <i>Crassostrea gigas</i> |
| MW504464.1 | USA         | 2017        | <i>Crassostrea gigas</i> |
| MW504463.1 | USA         | 2017        | <i>Crassostrea gigas</i> |

---
